# Supplementary material
Source: PubMed Central journal article supplement (PMC4545347)
Supplement: hesr0050-1069-sd2.pdf [file hesr0050-1069-sd2.pdf]

**Appendix Table: Summary Statistics and Full Regression Results**

|                                      | Summary Statistics  | Dependent Variable   |                      |                     |                      |                      |                     |
|--------------------------------------|---------------------|----------------------|----------------------|---------------------|----------------------|----------------------|---------------------|
|                                      |                     | Anti-psychotics      | Hypnotics            | Anxio-lytics        | Anti-depressants     | Psycho-actives       | Anti-botics         |
| Post†                                | 0.458<br>(0.498)    | -1.389***<br>(0.298) | -1.213***<br>(0.268) | 0.059<br>(0.367)    | -0.618<br>(0.488)    | -2.042***<br>(0.492) | -0.011<br>(0.387)   |
| Low Use Reporting Facilities * Post  | 0.201<br>(0.401)    | -0.614*<br>(0.329)   | 0.618**<br>(0.259)   | 0.095<br>(0.414)    | -0.574<br>(0.477)    | 0.416<br>(0.545)     | 0.050<br>(0.357)    |
| High Use Reporting Facilities * Post | 0.201<br>(0.401)    | -0.489<br>(0.317)    | 0.608**<br>(0.248)   | -0.016<br>(0.437)   | -0.354<br>(0.511)    | -0.009<br>(0.538)    | 0.298<br>(0.351)    |
| Government Ownership‡                | 0.058<br>(0.233)    | -0.824<br>(0.520)    | 0.328<br>(0.436)     | 0.445<br>(1.037)    | 0.647<br>(0.849)     | 0.666<br>(0.833)     | -0.219<br>(0.661)   |
| Not-for-profit Ownership             | 0.244<br>(0.430)    | 0.485<br>(0.665)     | -0.253<br>(0.411)    | -0.242<br>(0.745)   | -0.212<br>(0.675)    | 0.321<br>(0.722)     | 0.263<br>(0.398)    |
| Chain Membership                     | 0.545<br>(0.498)    | -0.073<br>(0.359)    | -0.140<br>(0.229)    | 0.239<br>(0.357)    | -0.418<br>(0.450)    | -0.945<br>(0.727)    | -0.021<br>(0.232)   |
| Part of CCRC                         | 0.095<br>(0.293)    | -0.313<br>(0.388)    | 0.354<br>(0.377)     | -0.005<br>(0.638)   | -0.479<br>(0.800)    | -0.147<br>(0.863)    | 0.348<br>(0.503)    |
| Number of Beds                       | 110.898<br>(69.608) | -0.001<br>(0.001)    | -0.000<br>(0.000)    | -0.001**<br>(0.000) | -0.001<br>(0.001)    | -0.003***<br>(0.001) | 0.000<br>(0.001)    |
| Occupancy Rate                       | 81.609<br>(23.732)  | -0.006<br>(0.011)    | -0.013<br>(0.009)    | -0.006<br>(0.013)   | -0.014<br>(0.014)    | -0.013<br>(0.018)    | 0.007<br>(0.011)    |
| Payer Mix: Medicaid                  | 50.091<br>(25.143)  | 0.029**<br>(0.013)   | 0.013<br>(0.009)     | 0.008<br>(0.014)    | 0.031*<br>(0.016)    | 0.031<br>(0.020)     | -0.016<br>(0.011)   |
| Payer Mix: Medicare                  | 11.870<br>(10.852)  | -0.041**<br>(0.017)  | 0.021*<br>(0.012)    | -0.024<br>(0.019)   | -0.081***<br>(0.025) | -0.064*<br>(0.033)   | 0.038*<br>(0.020)   |
| Acuity Index                         | 10.086<br>(1.602)   | 0.195**<br>(0.085)   | -0.051<br>(0.066)    | 0.366***<br>(0.078) | 0.572***<br>(0.147)  | 0.986***<br>(0.154)  | 0.307***<br>(0.105) |
| % Dementia                           | 47.696<br>(18.065)  | 0.053***<br>(0.007)  | -0.006<br>(0.005)    | 0.018***<br>(0.007) | 0.067***<br>(0.010)  | 0.082***<br>(0.013)  | 0.012**<br>(0.005)  |
| % Psychiatric Illness                | 28.342<br>(19.090)  | 0.064***<br>(0.009)  | 0.005<br>(0.004)     | 0.043***<br>(0.008) | 0.060***<br>(0.010)  | 0.063***<br>(0.010)  | 0.010*<br>(0.005)   |

|                                    |                    |                      |                     |                      |                      |                      |                     |
|------------------------------------|--------------------|----------------------|---------------------|----------------------|----------------------|----------------------|---------------------|
| % Depression                       | 47.153<br>(22.203) | 0.017***<br>(0.004)  | 0.003<br>(0.004)    | 0.013***<br>(0.005)  | 0.068***<br>(0.008)  | 0.054***<br>(0.007)  | 0.006**<br>(0.003)  |
| % Intellectual Disability          | 2.285<br>(5.782)   | 0.061**<br>(0.026)   | 0.050***<br>(0.015) | 0.052*<br>(0.026)    | -0.001<br>(0.030)    | 0.092**<br>(0.037)   | -0.019<br>(0.023)   |
| Dementia Special Care Unit         | 0.163<br>(0.370)   | 0.477<br>(0.422)     | 0.182<br>(0.219)    | 0.456<br>(0.419)     | 0.453<br>(0.556)     | 1.133**<br>(0.536)   | -0.209<br>(0.281)   |
| Registered Nurse (HPRD)            | 0.507<br>(1.223)   | 0.166<br>(0.142)     | 0.046<br>(0.153)    | -0.414*<br>(0.217)   | -0.308<br>(0.202)    | -0.394**<br>(0.183)  | 0.085<br>(0.116)    |
| Licensed Practical Nurse (HPRD)    | 0.907<br>(1.876)   | 0.115*<br>(0.067)    | 0.080<br>(0.075)    | 0.293**<br>(0.146)   | 0.085<br>(0.196)     | 0.191*<br>(0.098)    | -0.192<br>(0.130)   |
| Certified Nurse Aides (HPRD)       | 2.493<br>(4.134)   | -0.076**<br>(0.035)  | -0.054<br>(0.041)   | -0.043<br>(0.036)    | 0.010<br>(0.099)     | -0.014<br>(0.054)    | 0.074<br>(0.063)    |
| Nurse Staffing Inconsistent        | 0.008<br>(0.089)   | -2.431**<br>(1.014)  | 0.190<br>(1.385)    | 2.500<br>(1.710)     | 1.667<br>(2.451)     | 1.578<br>(2.589)     | 0.935<br>(1.597)    |
| Mental Health Services: Offsite‡   | 0.093<br>(0.291)   | 0.193<br>(0.286)     | 0.041<br>(0.211)    | 0.644<br>(0.418)     | 0.271<br>(0.704)     | 0.313<br>(0.546)     | -0.282<br>(0.315)   |
| Mental Health Services: On/Offsite | 0.198<br>(0.398)   | 0.134<br>(0.242)     | 0.201<br>(0.137)    | 0.284<br>(0.292)     | -0.163<br>(0.373)    | 0.031<br>(0.450)     | 0.201<br>(0.190)    |
| Mental Health Services: None       | 0.128<br>(0.334)   | 0.215<br>(0.243)     | 0.150<br>(0.203)    | 0.013<br>(0.285)     | -0.407<br>(0.418)    | -0.444<br>(0.543)    | 0.082<br>(0.333)    |
| Medical Model: Team‡               | 0.575<br>(0.494)   | -0.030<br>(0.173)    | 0.153<br>(0.143)    | -0.134<br>(0.233)    | 0.078<br>(0.330)     | 0.094<br>(0.334)     | 0.136<br>(0.181)    |
| Medical Model: Extenders Only      | 0.018<br>(0.133)   | -0.047<br>(0.399)    | 0.178<br>(0.437)    | -0.996*<br>(0.572)   | -0.904<br>(0.831)    | 0.060<br>(0.731)     | 0.466<br>(0.536)    |
| Medical Model: None                | 0.116<br>(0.320)   | -0.049<br>(0.247)    | 0.006<br>(0.160)    | -0.174<br>(0.342)    | 0.247<br>(0.301)     | -0.173<br>(0.396)    | -0.112<br>(0.265)   |
| Constant                           |                    | 16.804***<br>(0.981) | 8.137***<br>(0.821) | 16.503***<br>(1.059) | 35.882***<br>(1.992) | 47.969***<br>(1.961) | 4.626***<br>(1.157) |
| Observations                       |                    | 40,415               | 40,415              | 40,415               | 40,415               | 40,415               | 40,415              |
| R-squared                          |                    | 0.877                | 0.680               | 0.733                | 0.723                | 0.650                | 0.622               |

Summary statistics report average and standard deviations in parentheses. Regression coefficient estimates and standard errors (reported in parenthesis) are the last six columns. Regressions also include facility-specific fixed effects.

---

† The variable post reflects the change in prior and post public reporting for non-reporting facilities. For the low and high use times post are the coefficient estimates of the difference-in-difference estimator.

‡ The reference group for ownership is for-profit. The reference group for mental health services is services provided onsite. The reference group for medical model is medical director only.

\*\*\* p<0.01, \*\* p<0.05, \* p<0.10
